# Supplementary material for: Identification of The Fipronil Resistance Associated Mutations in Nilaparvata lugens GABA Receptors by Molecular Modeling
Source: MDPI journal article supplement (doi:10.3390/molecules24224116), 2019-11-14
Supplement: s1 [file s1]

# Identification of The Fipronil Resistance Associated Mutations in *Nilaparvata lugens* GABA Receptors by Molecular Modeling

Yafeng Tian, Ya Gao, Yanming Chen, Genyan Liu \* and Xiulian Ju \*

Key Laboratory for Green Chemical Process of Ministry of Education, School of Chemical Engineering and Pharmacy, Wuhan Institute of Technology, Wuhan 430205, China; 21706010103@wit.edu.cn (Y.T.); gaoya\_007@yeah.net (Y.G.); yanmingchen2018@163.com (Y.C.)

\* Correspondence: liugenyan@wit.edu.cn (G.L.); xiulianju2001@yahoo.com (X.J.); Tel.: +86-27-8719-4980 (G.L.)

**Table S1.** Evaluation assessment of the template and mutant models.

| Model       | Ramachandran Plot <sup>a</sup> |                    | Z-score <sup>b</sup> | Percentage of The Residues have Averaged 3D-1D Score $\geq 0.2$ <sup>c</sup> | ERRAT (Overall Quality Factor) <sup>d</sup> |
|-------------|--------------------------------|--------------------|----------------------|------------------------------------------------------------------------------|---------------------------------------------|
|             | Allowed Regions                | Disallowed Regions |                      |                                                                              |                                             |
| 4COF        | 99.7%                          | 0.3%               | -5.5                 | 65.71%                                                                       | 96.76                                       |
| Wild type   | 99.5%                          | 0.5%               | -4.85                | 70.61%                                                                       | 89.76                                       |
| A2'S        | 99.5%                          | 0.5%               | -3.78                | 71.31%                                                                       | 89.25                                       |
| R0'Q        | 99.5%                          | 0.5%               | -3.85                | 68.31%                                                                       | 89.54                                       |
| A2'S + R0'Q | 99.5%                          | 0.5%               | -3.79                | 69.08%                                                                       | 88.93                                       |

<sup>a</sup> The phi and psi angles distribution of each residue in the protein. <sup>b</sup> Energy evaluation of structure, carried out by ProSa. <sup>c</sup> Assessment of protein models with 3D profiles. <sup>d</sup> Quality factor for non-bonded atomic interactions.

PROCHECK

# Ramachandran Plot

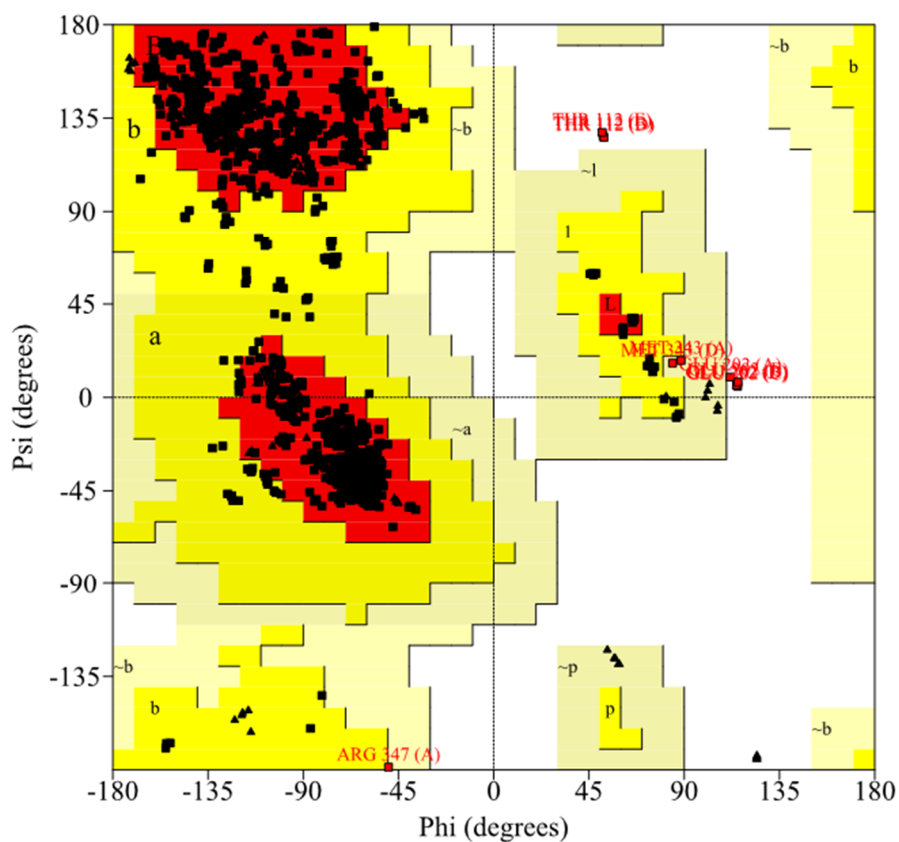

## Plot statistics

|                                                      |      |        |
|------------------------------------------------------|------|--------|
| Residues in most favoured regions [A,B,L]            | 1424 | 92.7%  |
| Residues in additional allowed regions [a,b,l,p]     | 101  | 6.6%   |
| Residues in generously allowed regions [-a,-b,-l,-p] | 3    | 0.2%   |
| Residues in disallowed regions                       | 8    | 0.5%   |
| -----                                                |      |        |
| Number of non-glycine and non-proline residues       | 1536 | 100.0% |
| Number of end-residues (excl. Gly and Pro)           | 10   |        |
| Number of glycine residues (shown as triangles)      | 80   |        |
| Number of proline residues                           | 75   |        |
| -----                                                |      |        |
| Total number of residues                             | 1701 |        |

Based on an analysis of 118 structures of resolution of at least 2.0 Angstroms and R-factor no greater than 20%, a good quality model would be expected to have over 90% in the most favoured regions.

**Figure S1.** The Ramachandran plot of the constructed *N. lugens* RDLR model.

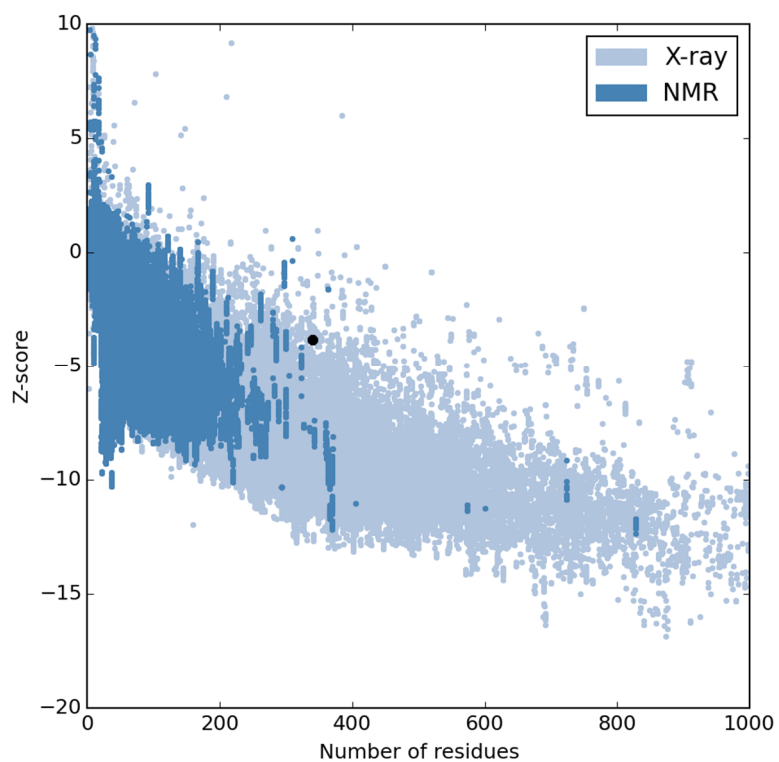

**Figure S2.** The ProSA evaluation of the constructed *N. lugens* RDLR model.
